# Supplementary material for: Diffusion measurements of hydrocarbons in H-MCM-41 extrudates with pulsed-field gradient nuclear magnetic resonance spectroscopy
Source: Royal Society of Chemistry journal article supplement (doi:10.1039/d2cp00138a), 2022-01-01
Supplement: d2cp00138a1.pdf [file d2cp00138a1.pdf]

# Supporting Information

## Diffusion measurements of hydrocarbons in H-MCM-41 extrudates with pulsed-field gradient nuclear magnetic resonance spectroscopy

Vladimir V. Zhivonitko<sup>a</sup>, Zuzana Vajglová<sup>b</sup>, Päivi Mäki-Arvela<sup>b</sup>, Narendra Kumar<sup>b</sup>,

Markus Peurla<sup>c</sup>, Ville-Veikko Telkki<sup>1</sup> and Dmitry Yu. Murzin<sup>b\*</sup>

<sup>a</sup> *NMR Research Unit, University of Oulu, Oulu, Finland*

<sup>b</sup> *Åbo Akademi University, Johan Gadolin Process Chemistry Centre, Henriksgatan 2, Turku/Åbo, Finland, 20500*

<sup>c</sup> *Institute of Biomedicine, University of Turku, Kiinamylynkatu 10, Turku, Finland, 20520*

\* [dmurzin@abo.fi](mailto:dmurzin@abo.fi), corresponding author

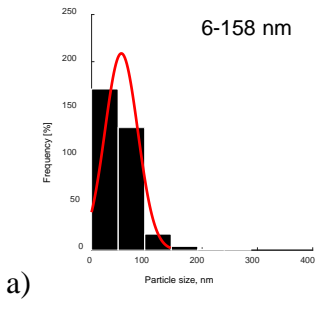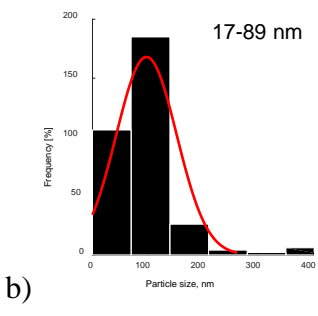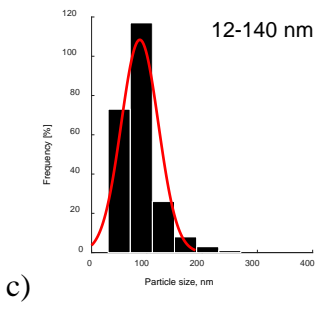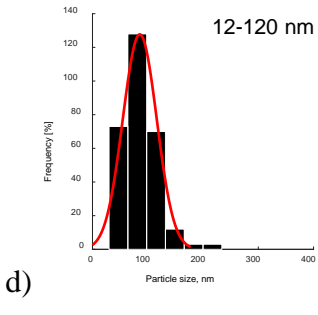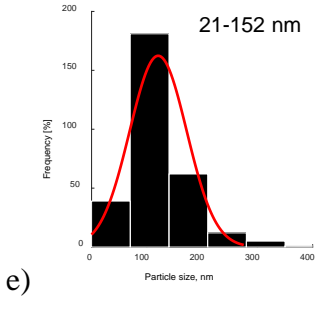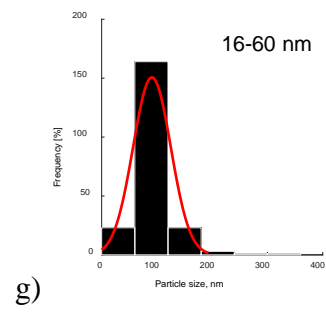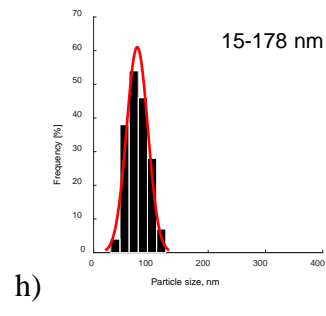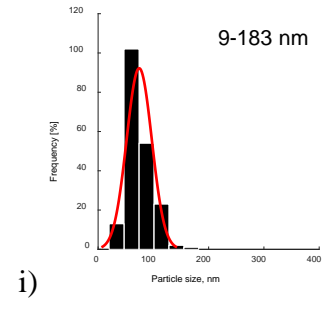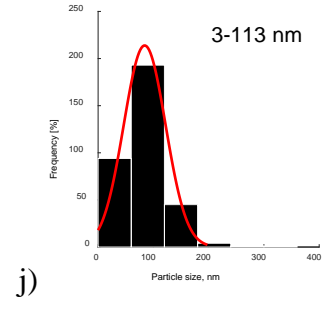

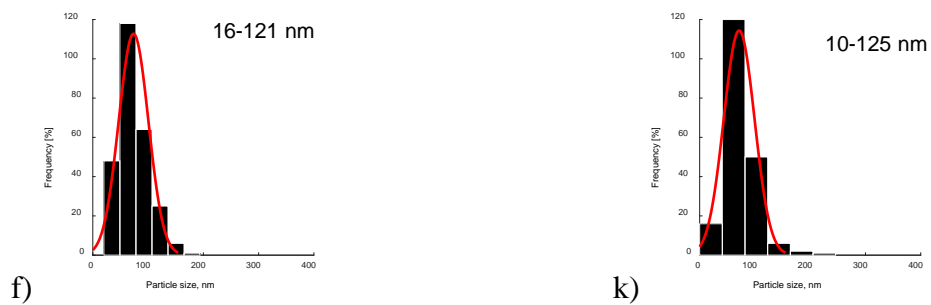

**Fig. S1** Particle size distribution determined from SEM: a) Bindzil (**B100-P**), b) H-MCM-41 (**M100-P**), c) H-MCM-41 with 10% Bindzil (**B10M90-P**), d) H-MCM-41 with 25% Bindzil (**B25M75-P**), e) H-MCM-41 with 30% Bindzil (**B30M70-P**), f) H-MCM-41 with 50% Bindzil (**B50M50-P**), g) H-MCM-41 (**M100-E**), h) H-MCM-41 with 10% Bindzil (**B10M90-E**), i) H-MCM-41 with 25% Bindzil (**B25M75-E**), j) H-MCM-41 with 30% Bindzil (**B30M70-E**), k) H-MCM-41 with 50% Bindzil (**B50M50-E**).

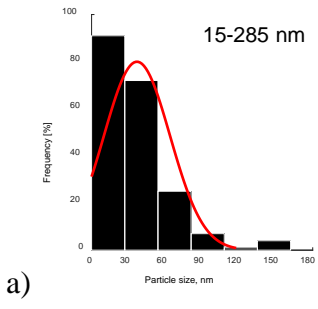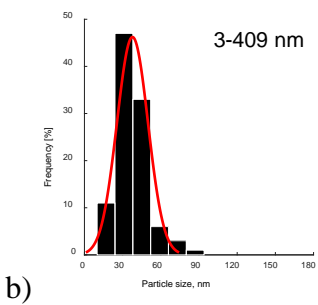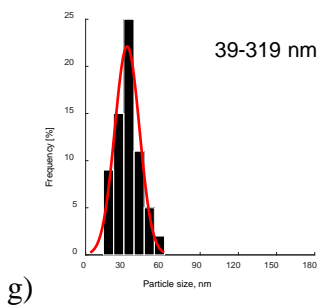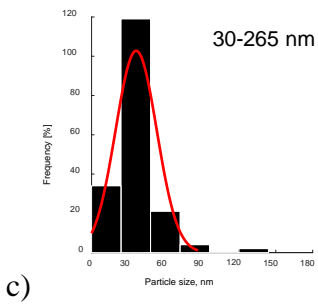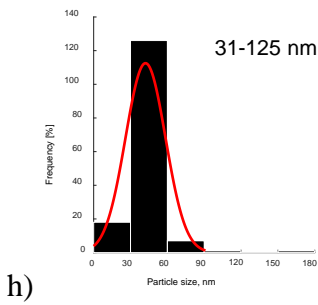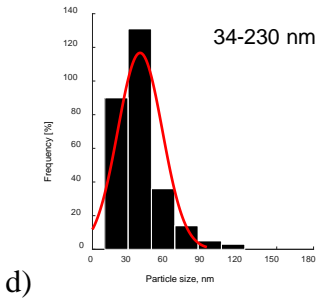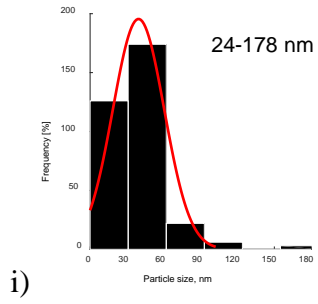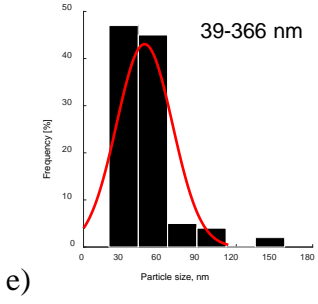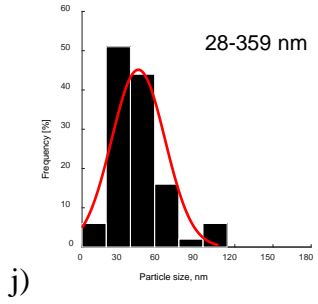

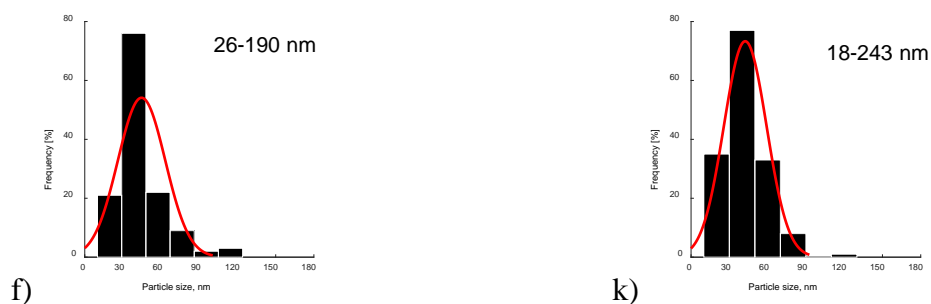

**Fig. S2** Particle size distribution determined from TEM: a) Bindzil (**B100-P**), b) H-MCM-41 (**M100-P**), c) H-MCM-41 with 10% Bindzil (**B10M90-P**), d) H-MCM-41 with 25% Bindzil (**B25M75-P**), e) H-MCM-41 with 30% Bindzil (**B30M70-P**), f) H-MCM-41 with 50% Bindzil (**B50M50-P**), g) H-MCM-41 (**M100-E**), h) H-MCM-41 with 10% Bindzil (**B10M90-E**), i) H-MCM-41 with 25% Bindzil (**B25M75-E**), j) H-MCM-41 with 30% Bindzil (**B30M70-E**), k) H-MCM-41 with 50% Bindzil (**B50M50-E**).

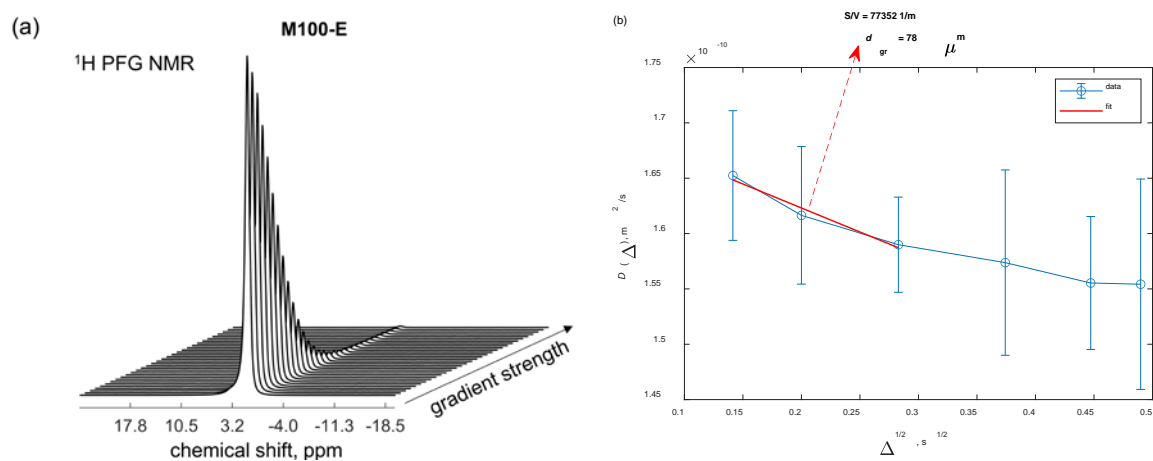

**Fig. S3** (a)  $^1\text{H}$  PFG NMR spectra as a function of the gradient strength measured for n-hexadecane in H-MCM-41 (**M100-E**) at diffusion time  $\Delta = 240$  ms. (b) Estimation of S/V ratio from the initial slope of  $D(\Delta)$  values and the corresponding grain size  $d_{\text{gr}}$ .

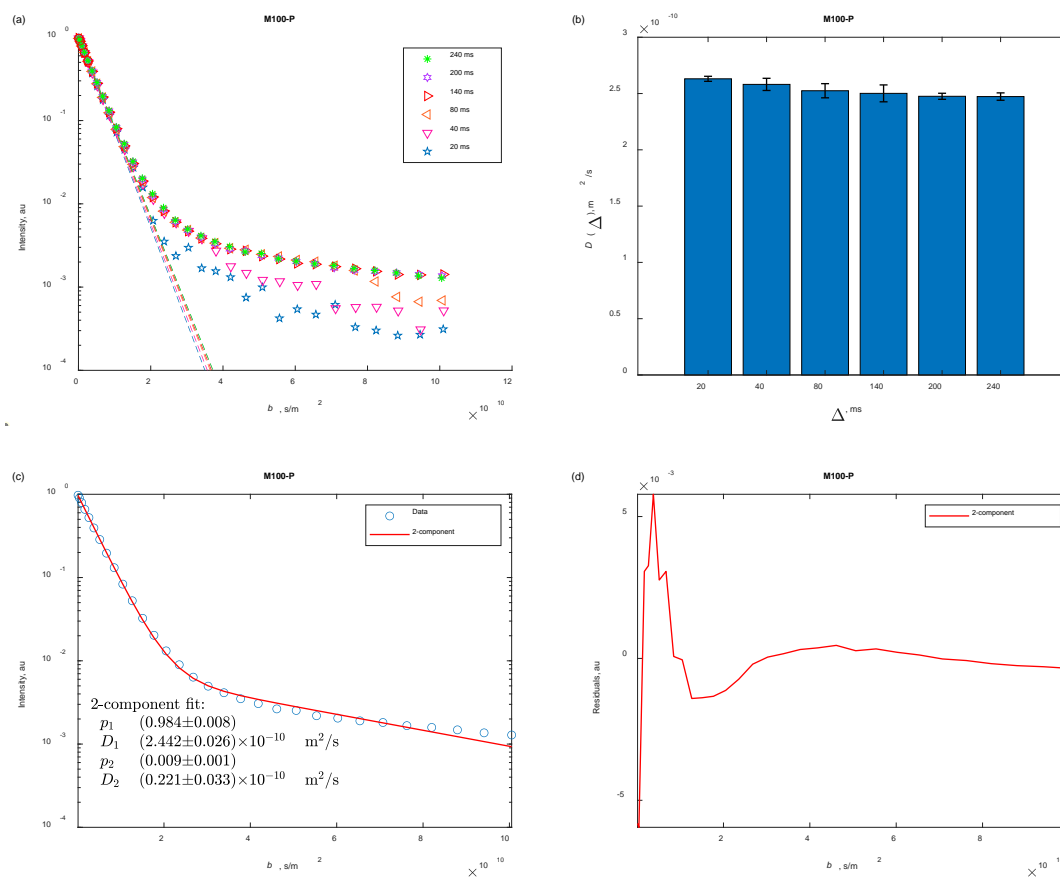

**Fig. S4** (a) Spin-echo attenuation curves at different diffusion times  $\Delta$  (see legend) obtained for n-hexadecane in H-MCM-41 (**M100-P**). The straight lines show the initial slope of the curves. (b) Apparent diffusion coefficient values extracted from the initial slope data. (c) Results of the 2-component fit (red curve) of the spin-echo attenuation curves for  $\Delta = 240$  ms of the same catalyst. (d) Residuals resulting after the fitting procedure.

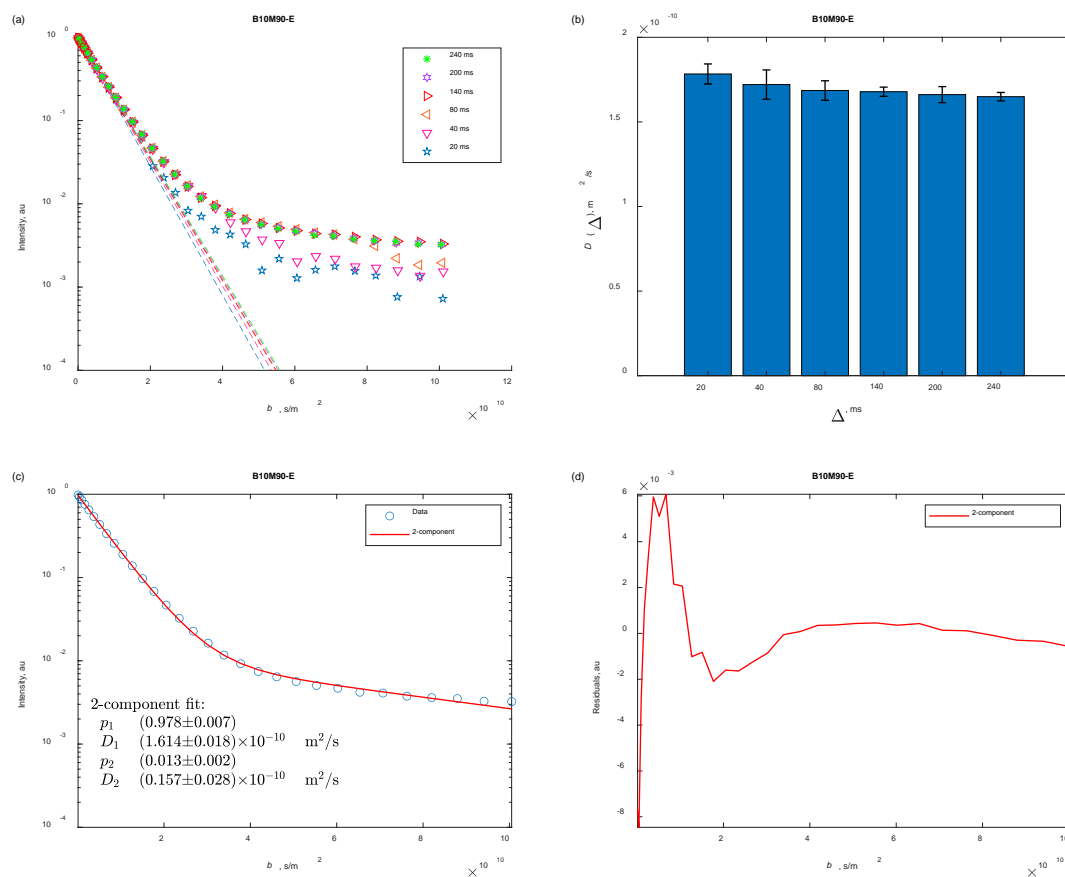

**Fig. S5** (a) Spin-echo attenuation curves at different diffusion times  $\Delta$  (see legend) obtained for n-hexadecane in H-MCM-41 with 10% of Bindzil (**B10M90-E**). The straight lines show the initial slope of the curves. (b) Apparent diffusion coefficient values extracted from the initial slope data. (c) Results of the 2-component fit (red curve) of the spin-echo attenuation curves for  $\Delta = 240$  ms of the same catalyst. (d) Residuals resulting after the fitting procedure.

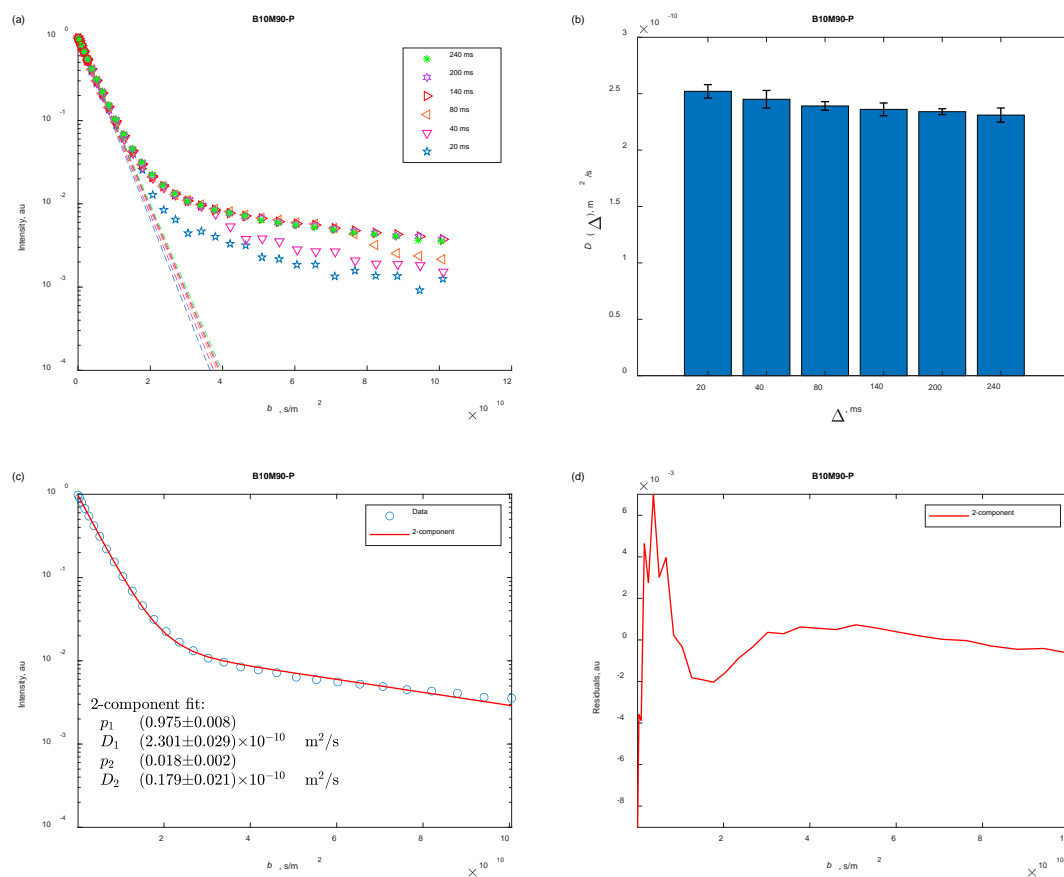

**Fig S6** (a) Spin-echo attenuation curves at different diffusion times  $\Delta$  (see legend) obtained for n-hexadecane in H-MCM-41 with 10% of Bindzil (B10M90-P). The straight lines show the initial slope of the curves. (b) Apparent diffusion coefficient values extracted from the initial slope data. (c) Results of the 2-component fit (red curve) of the spin-echo attenuation curves for  $\Delta = 240$  ms of the same catalyst. (d) Residuals resulting after the fitting procedure.



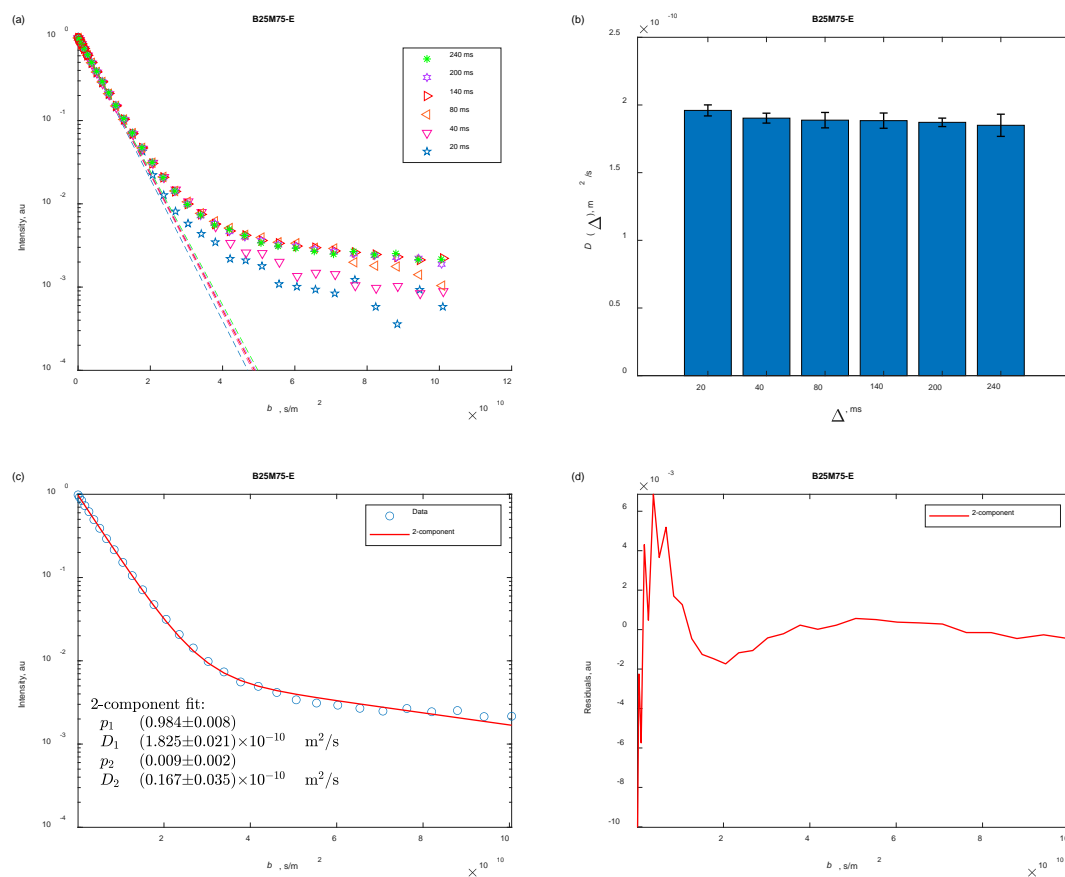

**Fig. S7** (a) Spin-echo attenuation curves at different diffusion times  $\Delta$  (see legend) obtained for n-hexadecane in H-MCM-41 with 25% of Bindzil (**B25M75-E**). The straight lines show the initial slope of the curves. (b) Apparent diffusion coefficient values extracted from the initial slope data. (c) Results of the 2-component fit (red curve) of the spin-echo attenuation curves for  $\Delta = 240$  ms of the same catalyst. (d) Residuals resulting after the fitting procedure.

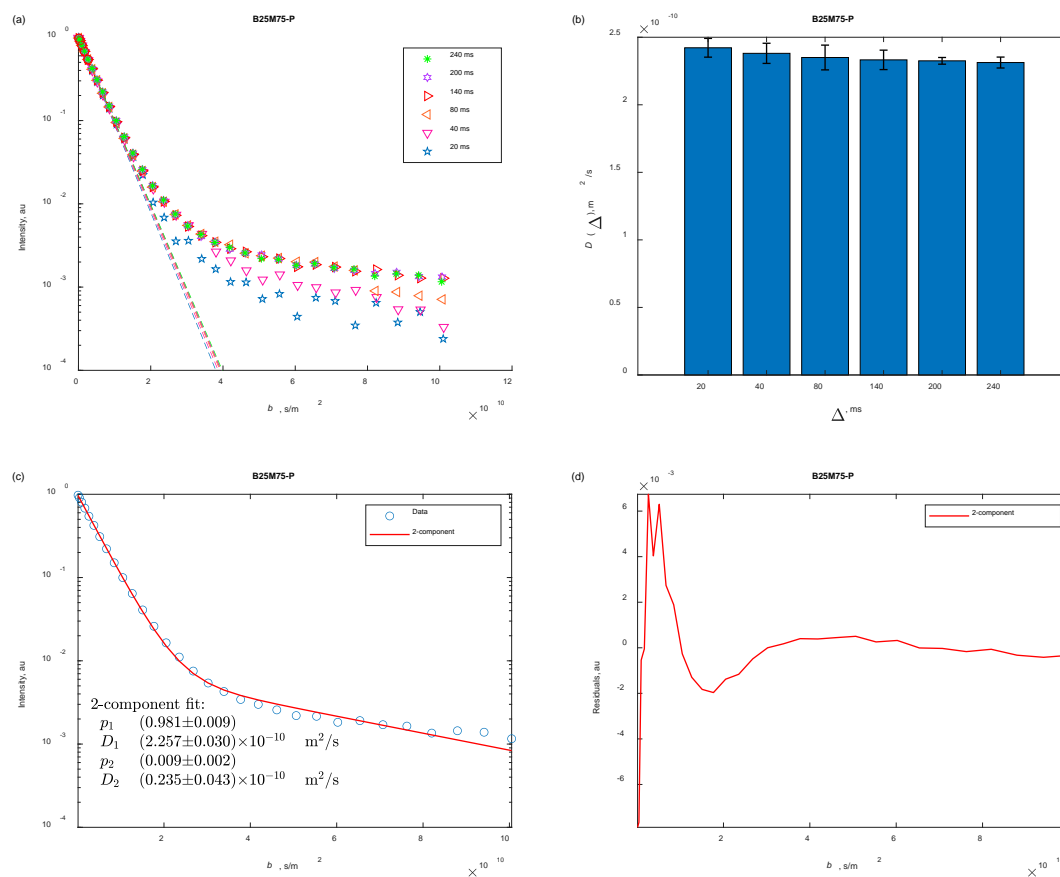

**Fig. S8** (a) Spin-echo attenuation curves at different diffusion times  $\Delta$  (see legend) obtained for n-hexadecane in H-MCM-41 with 25% of Bindzil (**B25M75-P**). The straight lines show the initial slope of the curves. (b) Apparent diffusion coefficient values extracted from the initial slope data. (c) Results of the 2-component fit (red curve) of the spin-echo attenuation curves for  $\Delta = 240 \text{ ms}$  of the same catalyst. (d) Residuals resulting after the fitting procedure.

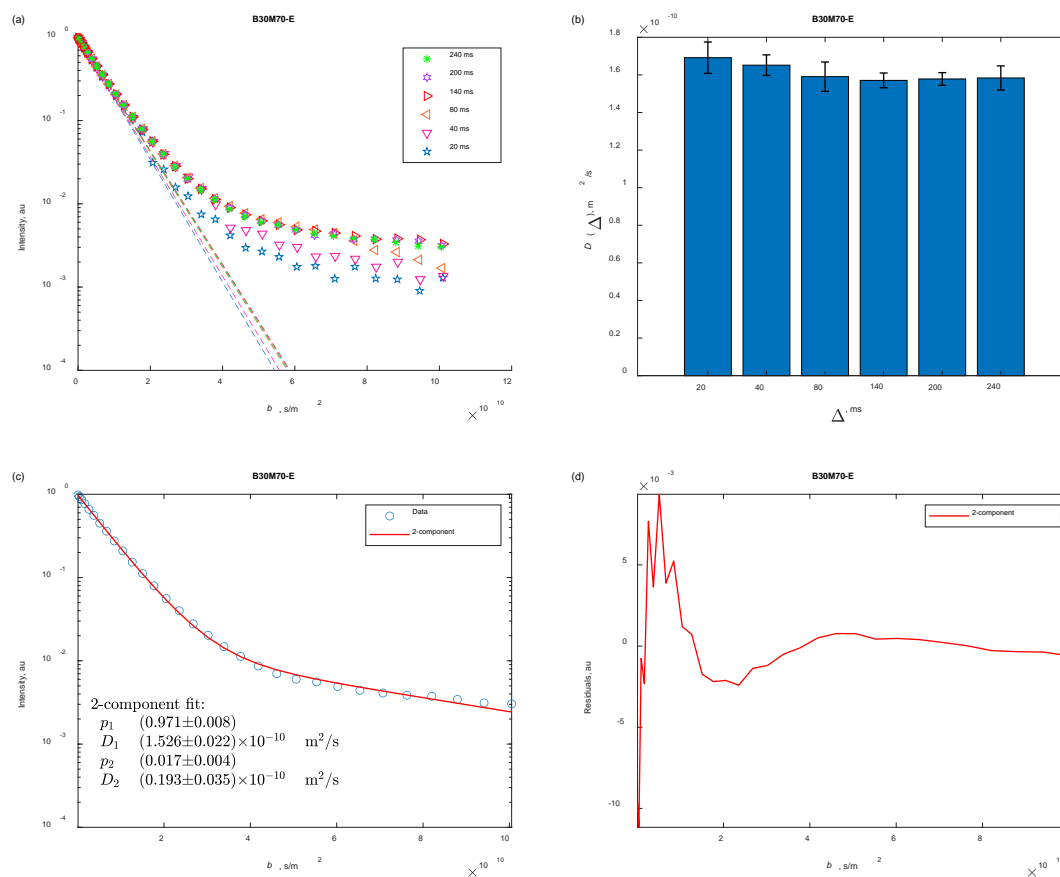

**Fig. S9** (a) Spin-echo attenuation curves at different diffusion times  $\Delta$  (see legend) obtained for n-hexadecane in H-MCM-41 with 30% of Bindzil (**B30M70-E**). The straight lines show the initial slope of the curves. (b) Apparent diffusion coefficient values extracted from the initial slope data. (c) Results of the 2-component fit (red curve) of the spin-echo attenuation curves for  $\Delta = 240$  ms of the same catalyst. (d) Residuals resulting after the fitting procedure.

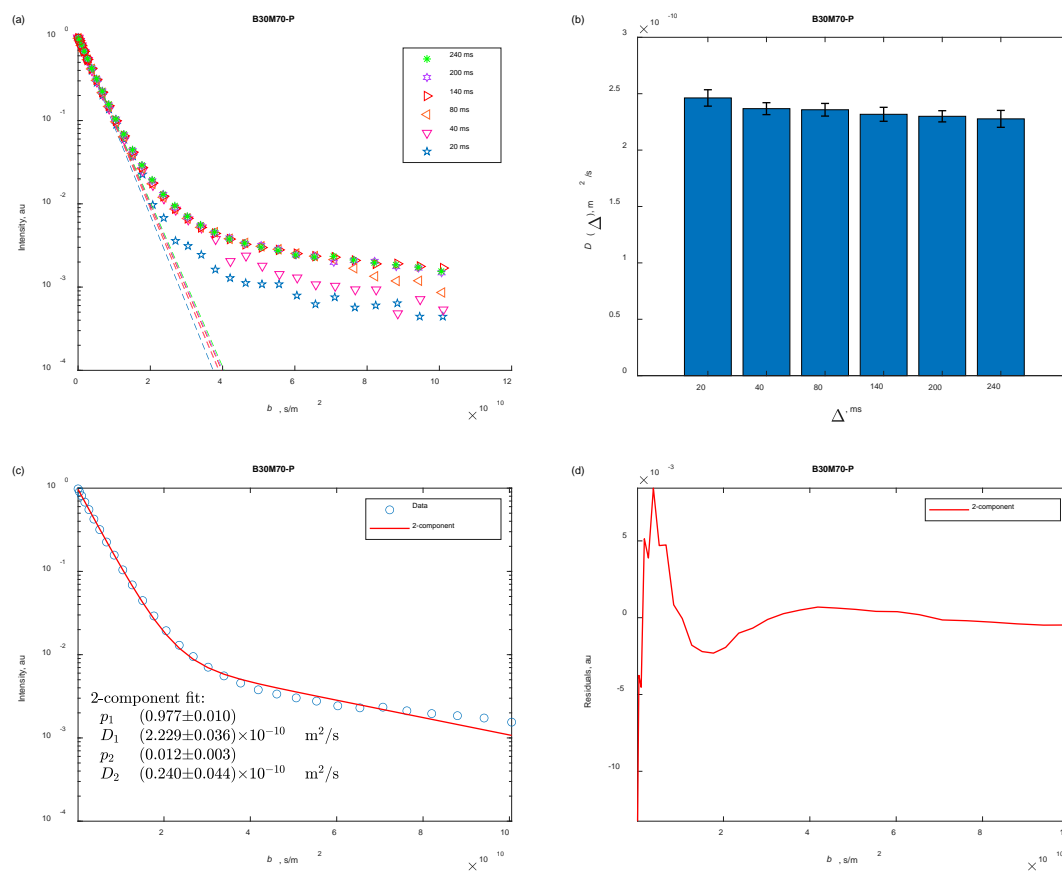

**Fig. S10** (a) Spin-echo attenuation curves at different diffusion times  $\Delta$  (see legend) obtained for n-hexadecane in H-MCM-41 with 30% Bindzil (**B30M70-P**). The straight lines show the initial slope of the curves. (b) Apparent diffusion coefficient values extracted from the initial slope data. (c) Results of the 2-component fit (red curve) of the spin-echo attenuation curves for  $\Delta = 240$  ms of the same catalyst. (d) Residuals resulting after the fitting procedure.

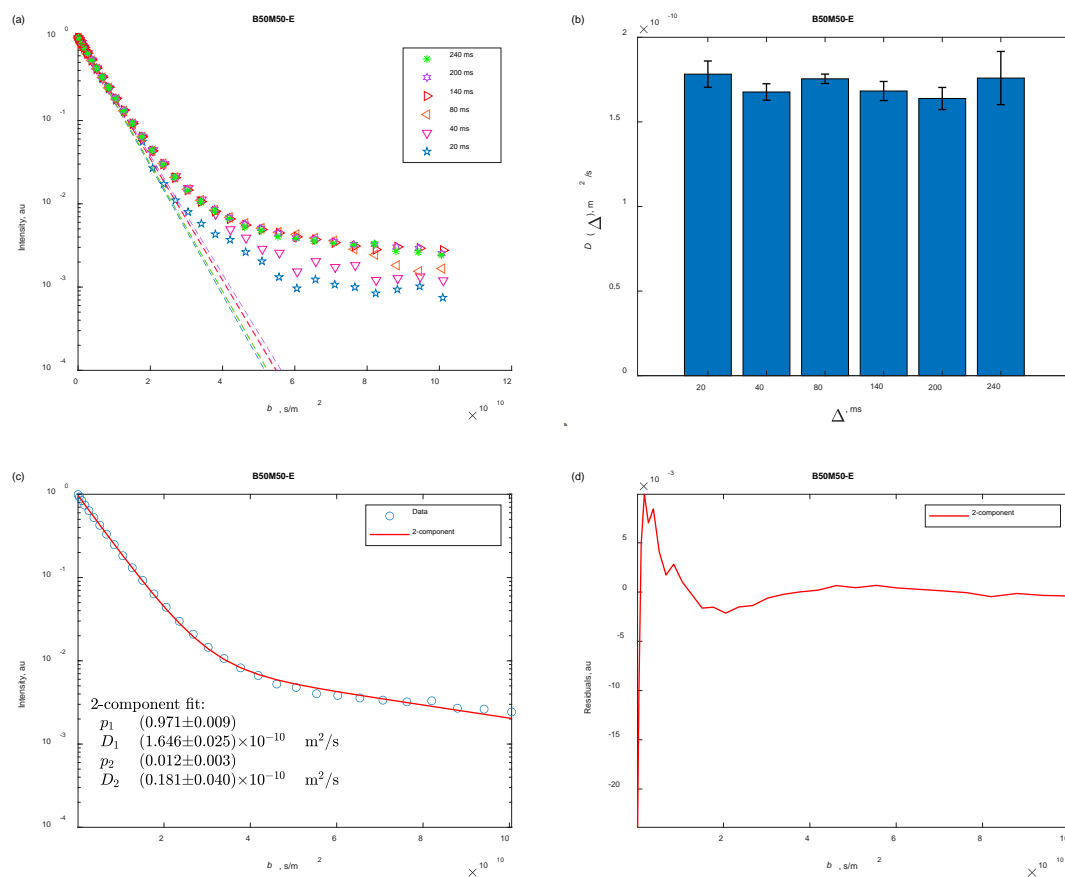

**Fig. S11** (a) Spin-echo attenuation curves at different diffusion times  $\Delta$  (see legend) obtained for n-hexadecane in H-MCM-41 with 50% of Bindzil (**B50M50-E**). The straight lines show the initial slope of the curves. (b) Apparent diffusion coefficient values extracted from the initial slope data. (c) Results of the 2-component fit (red curve) of the spin-echo attenuation curves for  $\Delta = 240$  ms of the same catalyst. (d) Residuals resulting after the fitting procedure.

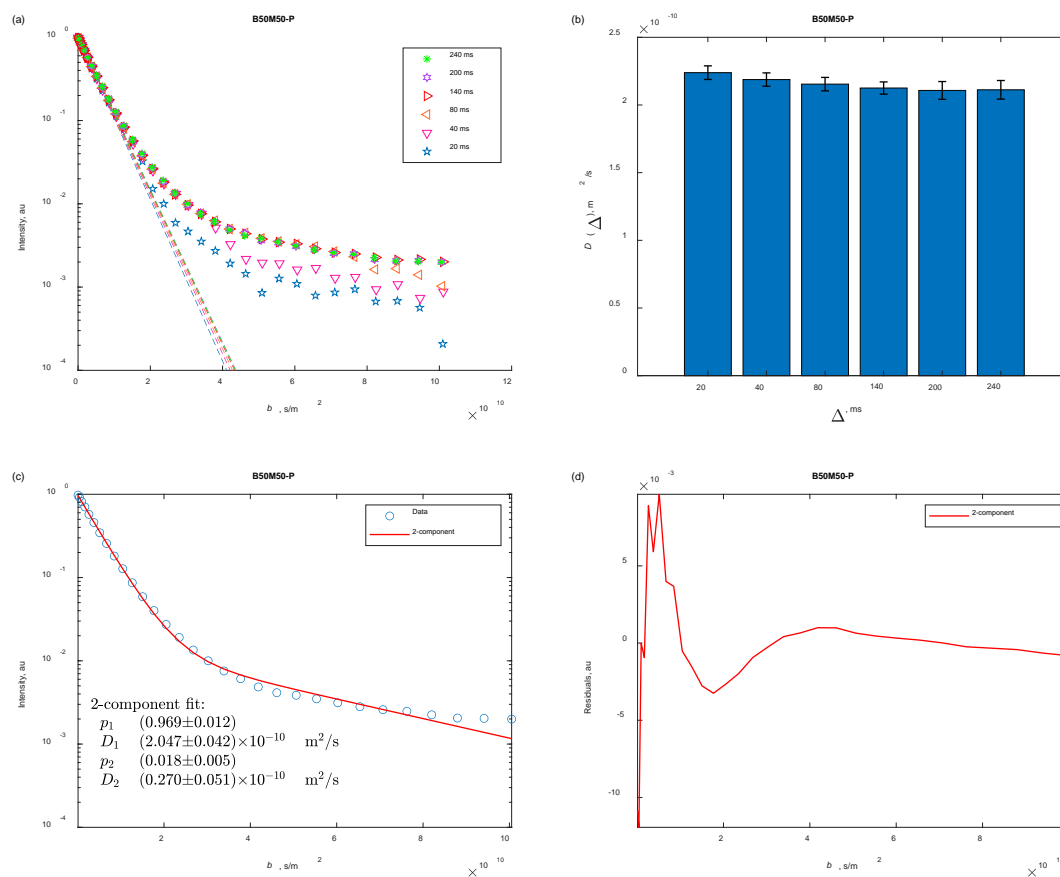

**Fig. S12** (a) Spin-echo attenuation curves at different diffusion times  $\Delta$  (see legend) obtained for n-hexadecane in H-MCM-41 with 50% of Bindzil (**B50M50-P**). The straight lines show the initial slope of the curves. (b) Apparent diffusion coefficient values extracted from the initial slope data. (c) Results of the 2-component fit (red curve) of the spin-echo attenuation curves for  $\Delta = 240$  ms of the same catalyst. (d) Residuals resulting after the fitting procedure.

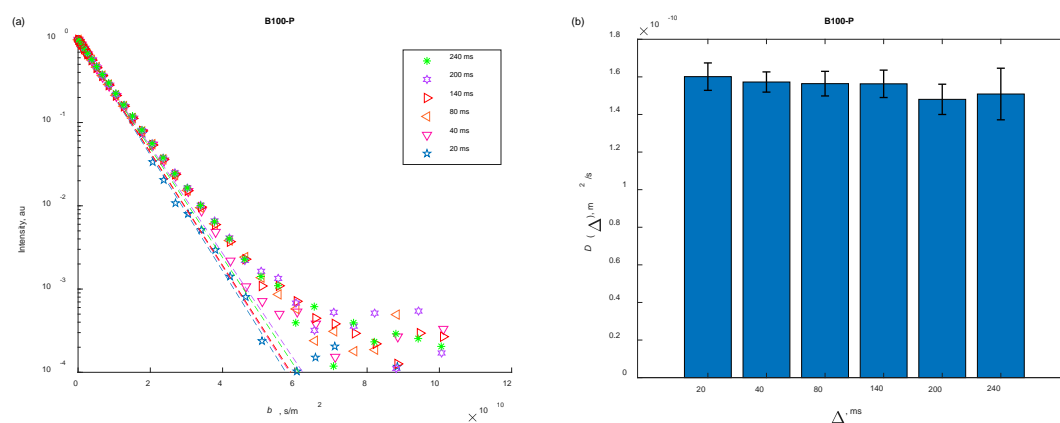

**Fig. S13** Spin-echo attenuation curves at different diffusion times  $\Delta$  (see legend) obtained for n-hexadecane in Bindzil (**B100-P**). The straight lines show the initial slope of the curved. (b) Apparent diffusion coefficient values extracted from the initial slope data.

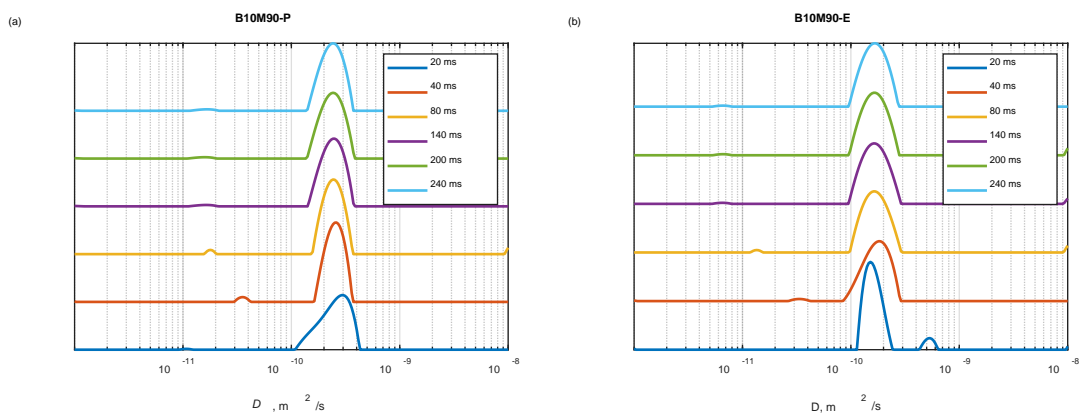

**Fig. S14** Diffusion coefficient distributions obtained in Laplace inversion of PFG NMR spin-echo attenuation curves at different diffusion times  $\Delta$  (see legend) for (a) H-MCM-41 with 10% of Bindzil (**B10M90-P**) and (b) H-MCM-41 with 10% of Bindzil (**B10M90-E**) catalysts.

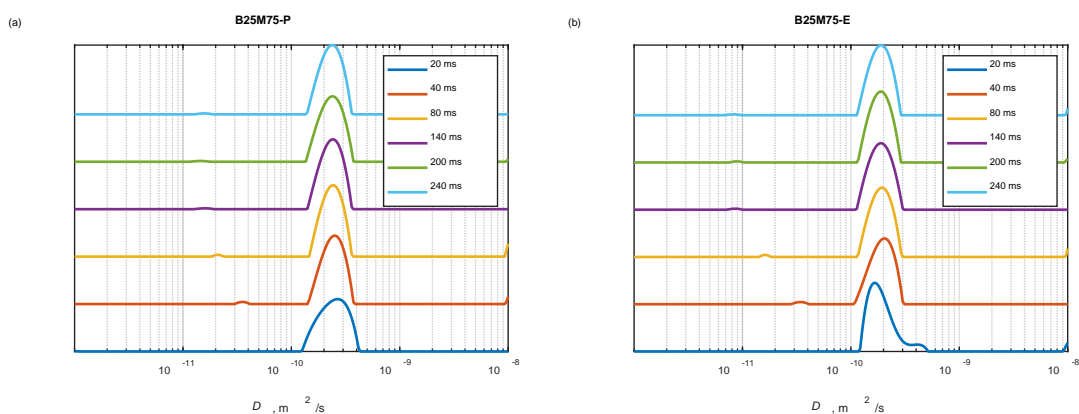

**Fig. S15** Diffusion coefficient distributions obtained in Laplace inversion of PFG NMR spin-echo attenuation curves at different diffusion times  $\Delta$  (see legend) for (a) H-MCM-41 with 25% of Bindzil (**B25M75-P**) and (b) H-MCM-41 with 25% of Bindzil (**B25M75-E**) catalysts.

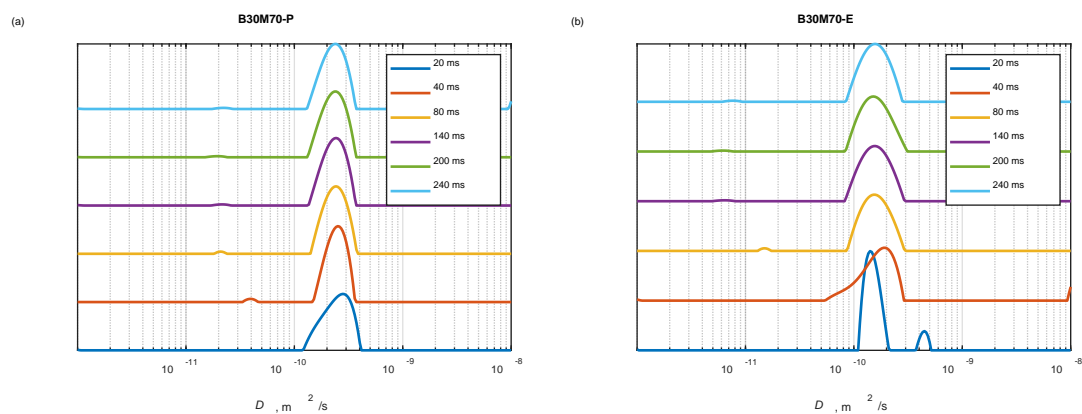

**Fig. S16** Diffusion coefficient distributions obtained in Laplace inversion of PFG NMR spin-echo attenuation curves at different diffusion times  $\Delta$  (see legend) for (a) H-MCM-41 with 30% of Bindzil (**B30M70-P**) and (b) H-MCM-41 with 30% of Bindzil (**B30M70-E**) catalysts.

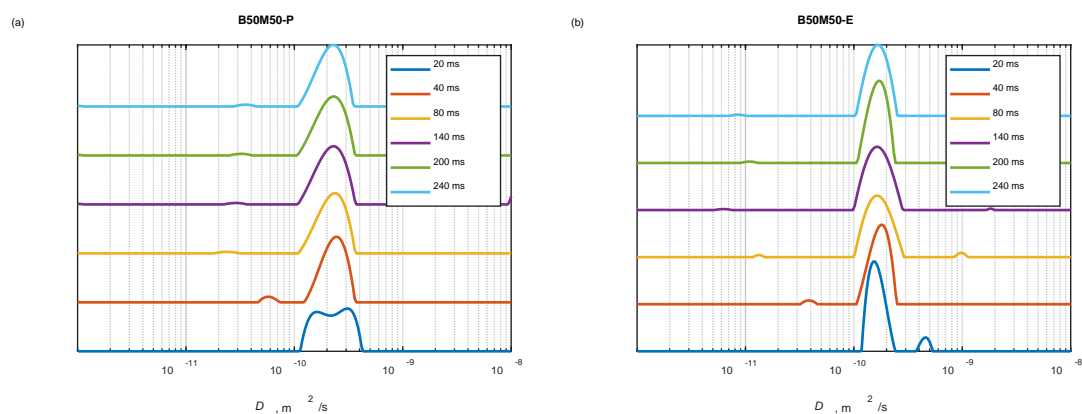

**Fig. S17** Diffusion coefficient distributions obtained in Laplace inversion of PFG NMR spin-echo attenuation curves at different diffusion times  $\Delta$  (see legend) for (a) H-MCM-41 with 50% of Bindzil (**B50M50-P**) and (b) H-MCM-41 with 50% of Bindzil (**B50M50-E**) catalysts.



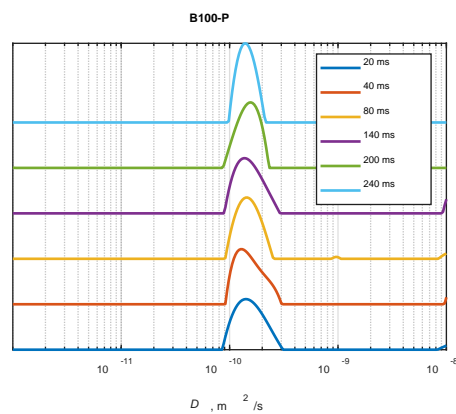

**Fig. S18** Diffusion coefficient distributions obtained in Laplace inversion of PFG NMR spin-echo attenuation curves at different diffusion times  $\Delta$  (see legend) for Bindzil (**B100-P**).
